# Supplementary material for: Pentacyclic Triterpenes from Cecropia telenitida Can Function as Inhibitors of 11β-Hydroxysteroid Dehydrogenase Type 1
Source: PubMed Central journal article supplement (PMC6099733; doi:10.3390/molecules23061444), 2018-06-14

## Supplemental Material

# **Pentacyclic triterpenes from *Cecropia telenitida* can function as inhibitors of 11 $\beta$ -Hydroxysteroid dehydrogenase type 1**

**Mosquera Catalina<sup>a</sup>, Aram J. Panay<sup>a</sup>, Montoya Guillermo<sup>b\*</sup>**

<sup>a</sup> Department of Chemical Sciences. Faculty of Natural Sciences. Universidad Icesi. Cali-Colombia

<sup>b</sup> Department of Pharmaceutical Sciences. Faculty of Natural Sciences. Universidad Icesi. Cali-Colombia

\* Corresponding author. Department of Pharmaceutical Sciences. Faculty of Natural Sciences. Universidad Icesi. Calle 18 # 122-135. Phone +57-2-5552334 ext. 8557. Cali-Colombia

## Increased variability when PT is present in the reaction well plate

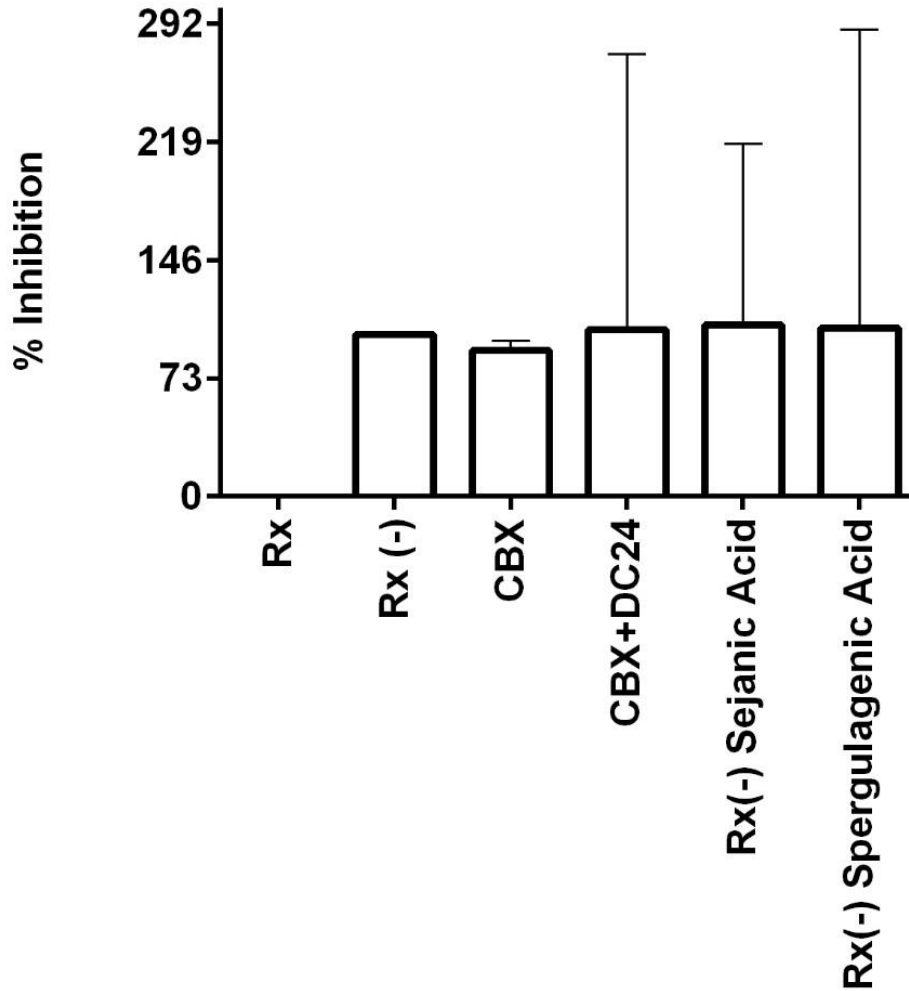

The  $11\beta$ -HSD1 inhibition results including Carbenoxolone spiked with non-commercially PT, and DC24 fraction (2  $\mu$ M for the pure triterpenes). When the inhibition assay was supplemented with triterpene molecules like spergulagenic and serjanic acids, and DC24 fraction that are not  $11\beta$ -HSD1 inhibitors, the error bars increased substantially.

**TLC analysis of the hit fractions E10 and DE16  
from the chemical library**

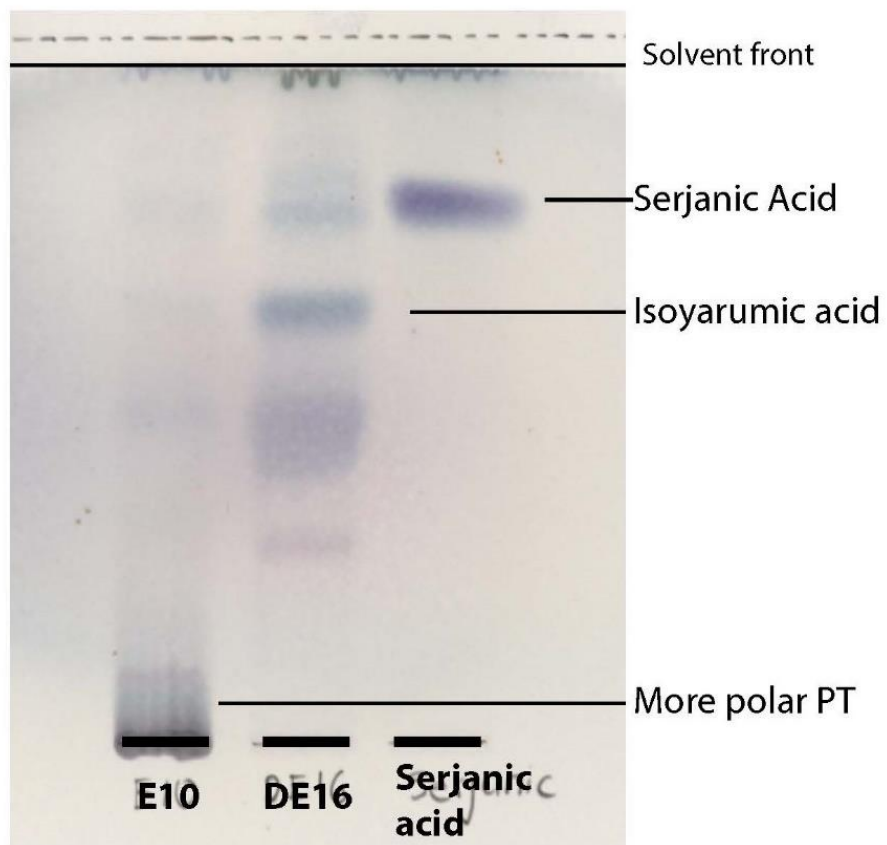

A TLC chromatography of fractions E10 and DE16 shown analytes with comparable coloration profile when reacting with vanillin, assuming apparently the presence of more polar PT.

## **Nuclear magnetic resonance experiments**

(Bruker Ascend III HD 600 MHz spectrometer)

S1.  $^1\text{H}$ -NMR spectrum

S2.  $^{13}\text{C}$ -NMR complete spectrum with a zoom between 14 and 49 ppm

S2.  $^{13}\text{C}$ -NMR spectrum. A zoom between 35 to 43 ppm to clarify a peak overlapped with deuterated solvent signal.

S3. DEPT 135 spectrum

S4. COSY H-H Spectrum

S5. HMBC spectrum and a zoom in the chemical shifts of methyl groups

S6. A selective HSQC spectrum and a zoom in the chemical shifts of methyl groups

S7.  $^1\text{H}$ - $^{13}\text{C}$  multiplicity-edited HSQC using echo-antiecho spectrum with a zoom in the chemical shifts of methyl groups

## **HRMS of Isoyarumic acid.**

The ionic specie  $C_{30}H_{49}O_5^+$  ( $m/z$  489.35745) was determined by means of Q-Exactive hybrid quadrupole-Orbitrap mass spectrometry and the experimental data were  $m/z$  489.35580 (1.65 ppm error). It is also possible to detect two hydroxyl loses and the sodium adduct of the molecule.

D:\usuarios\71...0180312\_008.raw Injection 1 FTMS + c ESI F...0000-1290.0000] TIC

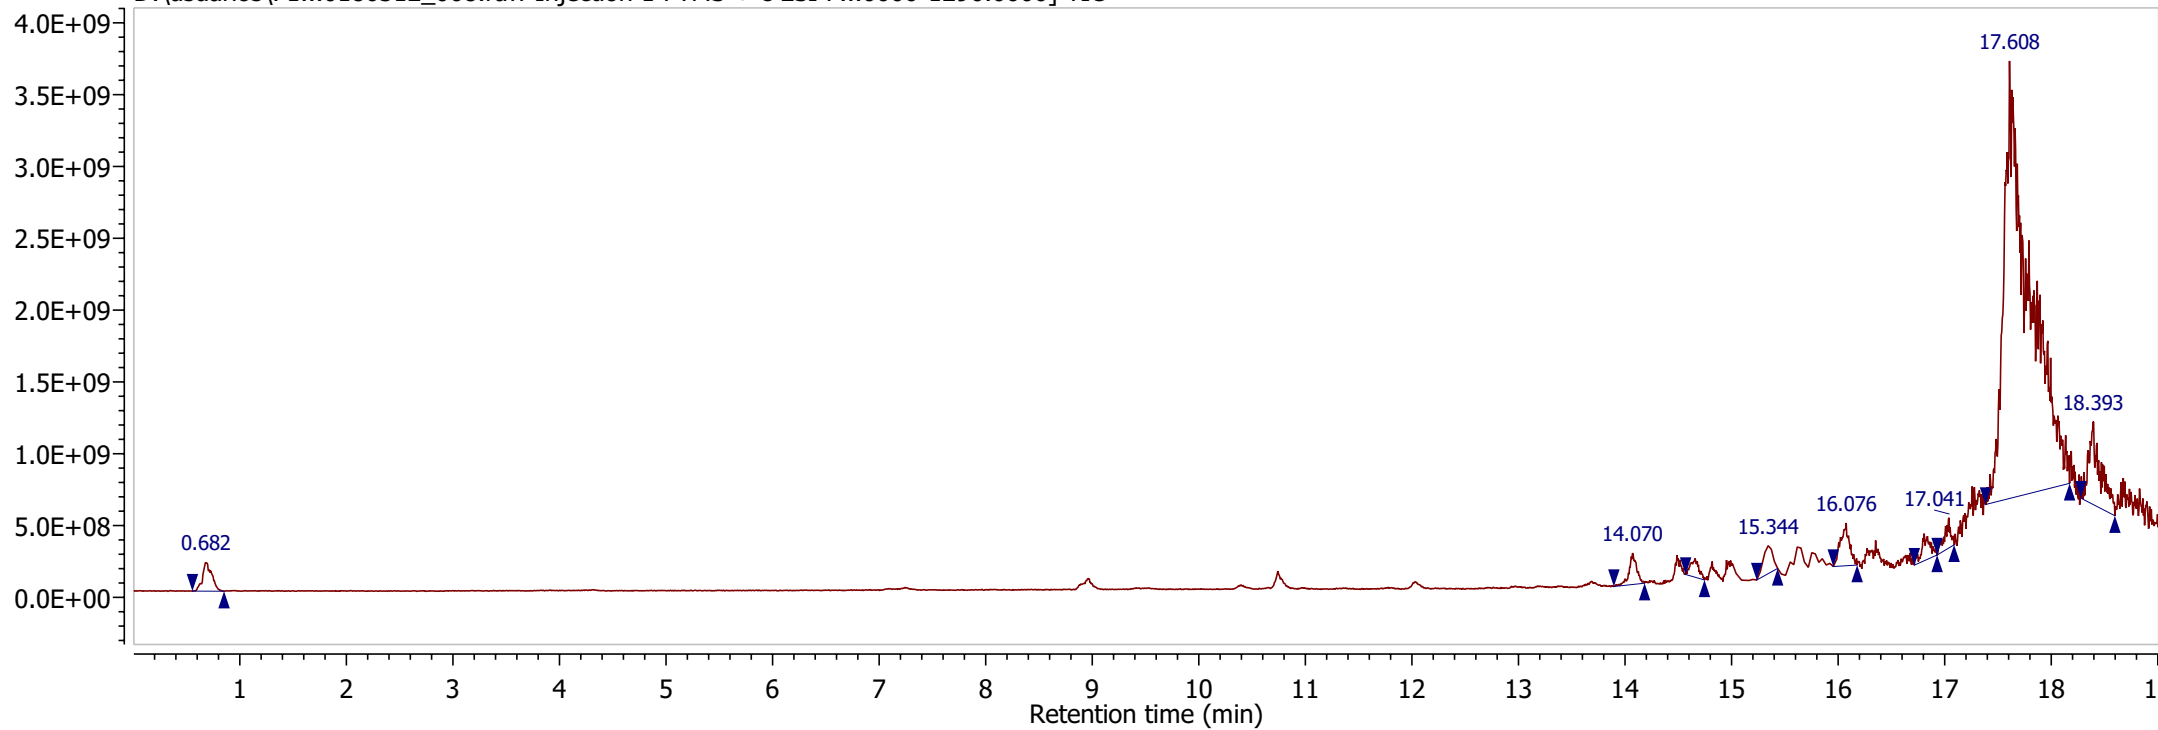

D:\usuarios\71...0180312\_008.raw Injection 1 FTMS + c ESI F...0000-1290.0000] MS + spectrum 15.34

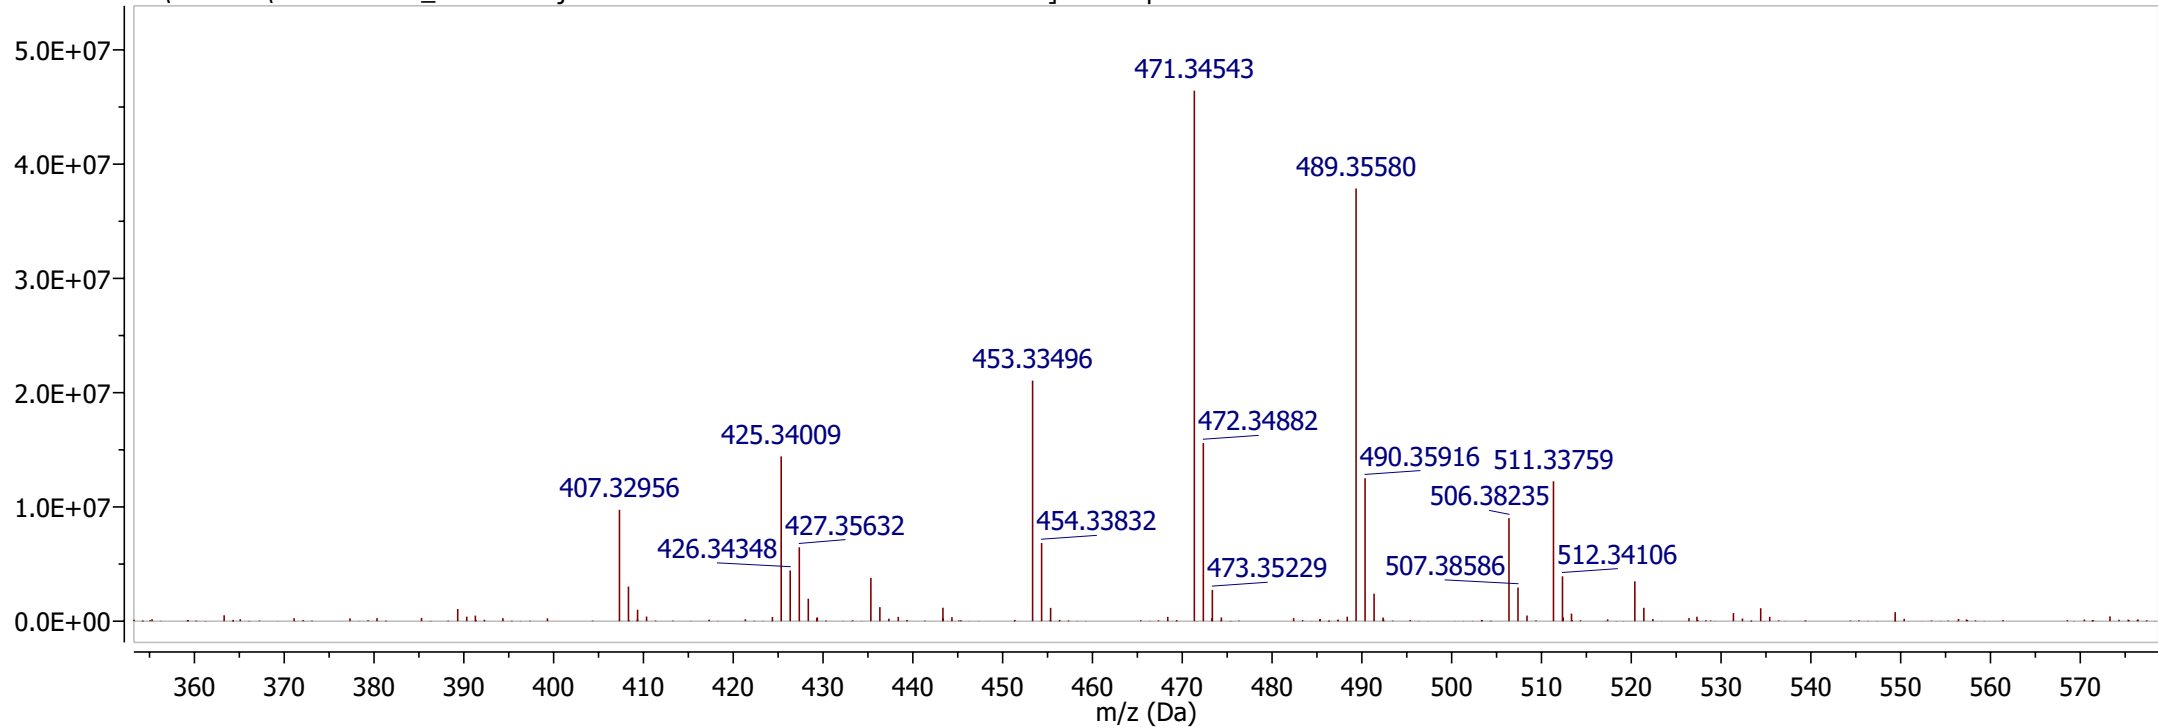

S1.  $^1\text{H}$ -NMR spectrum

triterpeno desconocido.10.1.1r  
ICESI 4 en DMSO

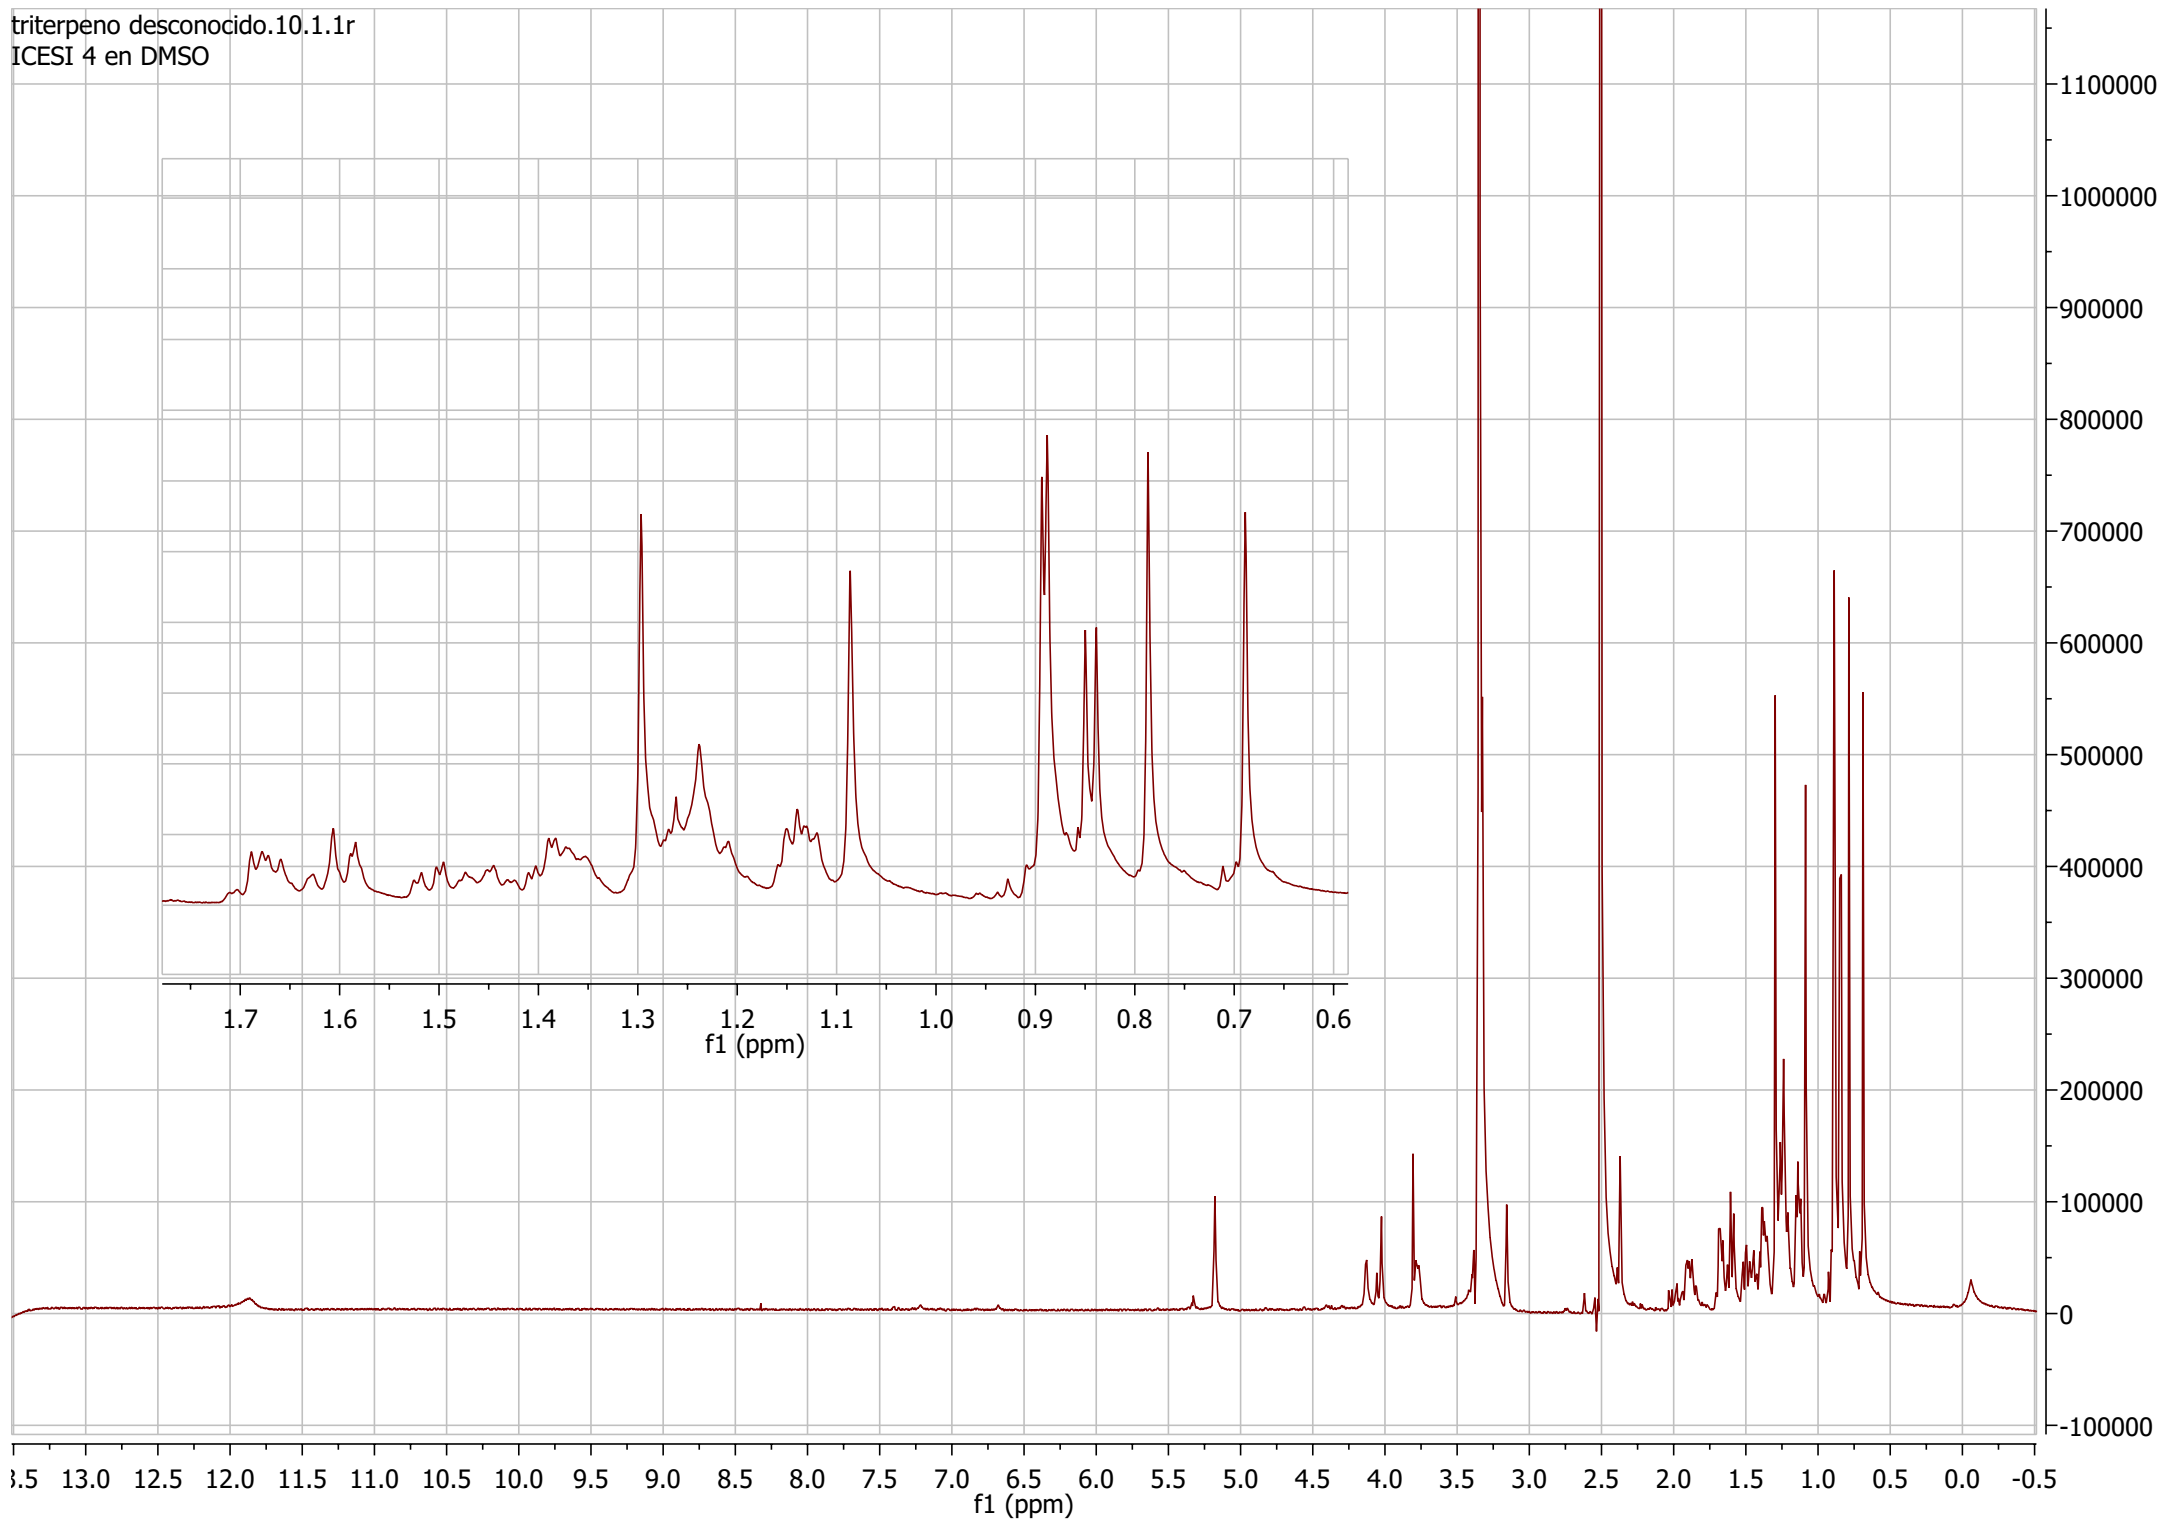



S2.  $^{13}\text{C}$ -NMR spectrum. A zoom between 35 to 43 ppm to clarify a peak overlapped with deuterated solvent signal.

triterpeno desconocido.12.1.1r  
ICESI 4 en DMSO

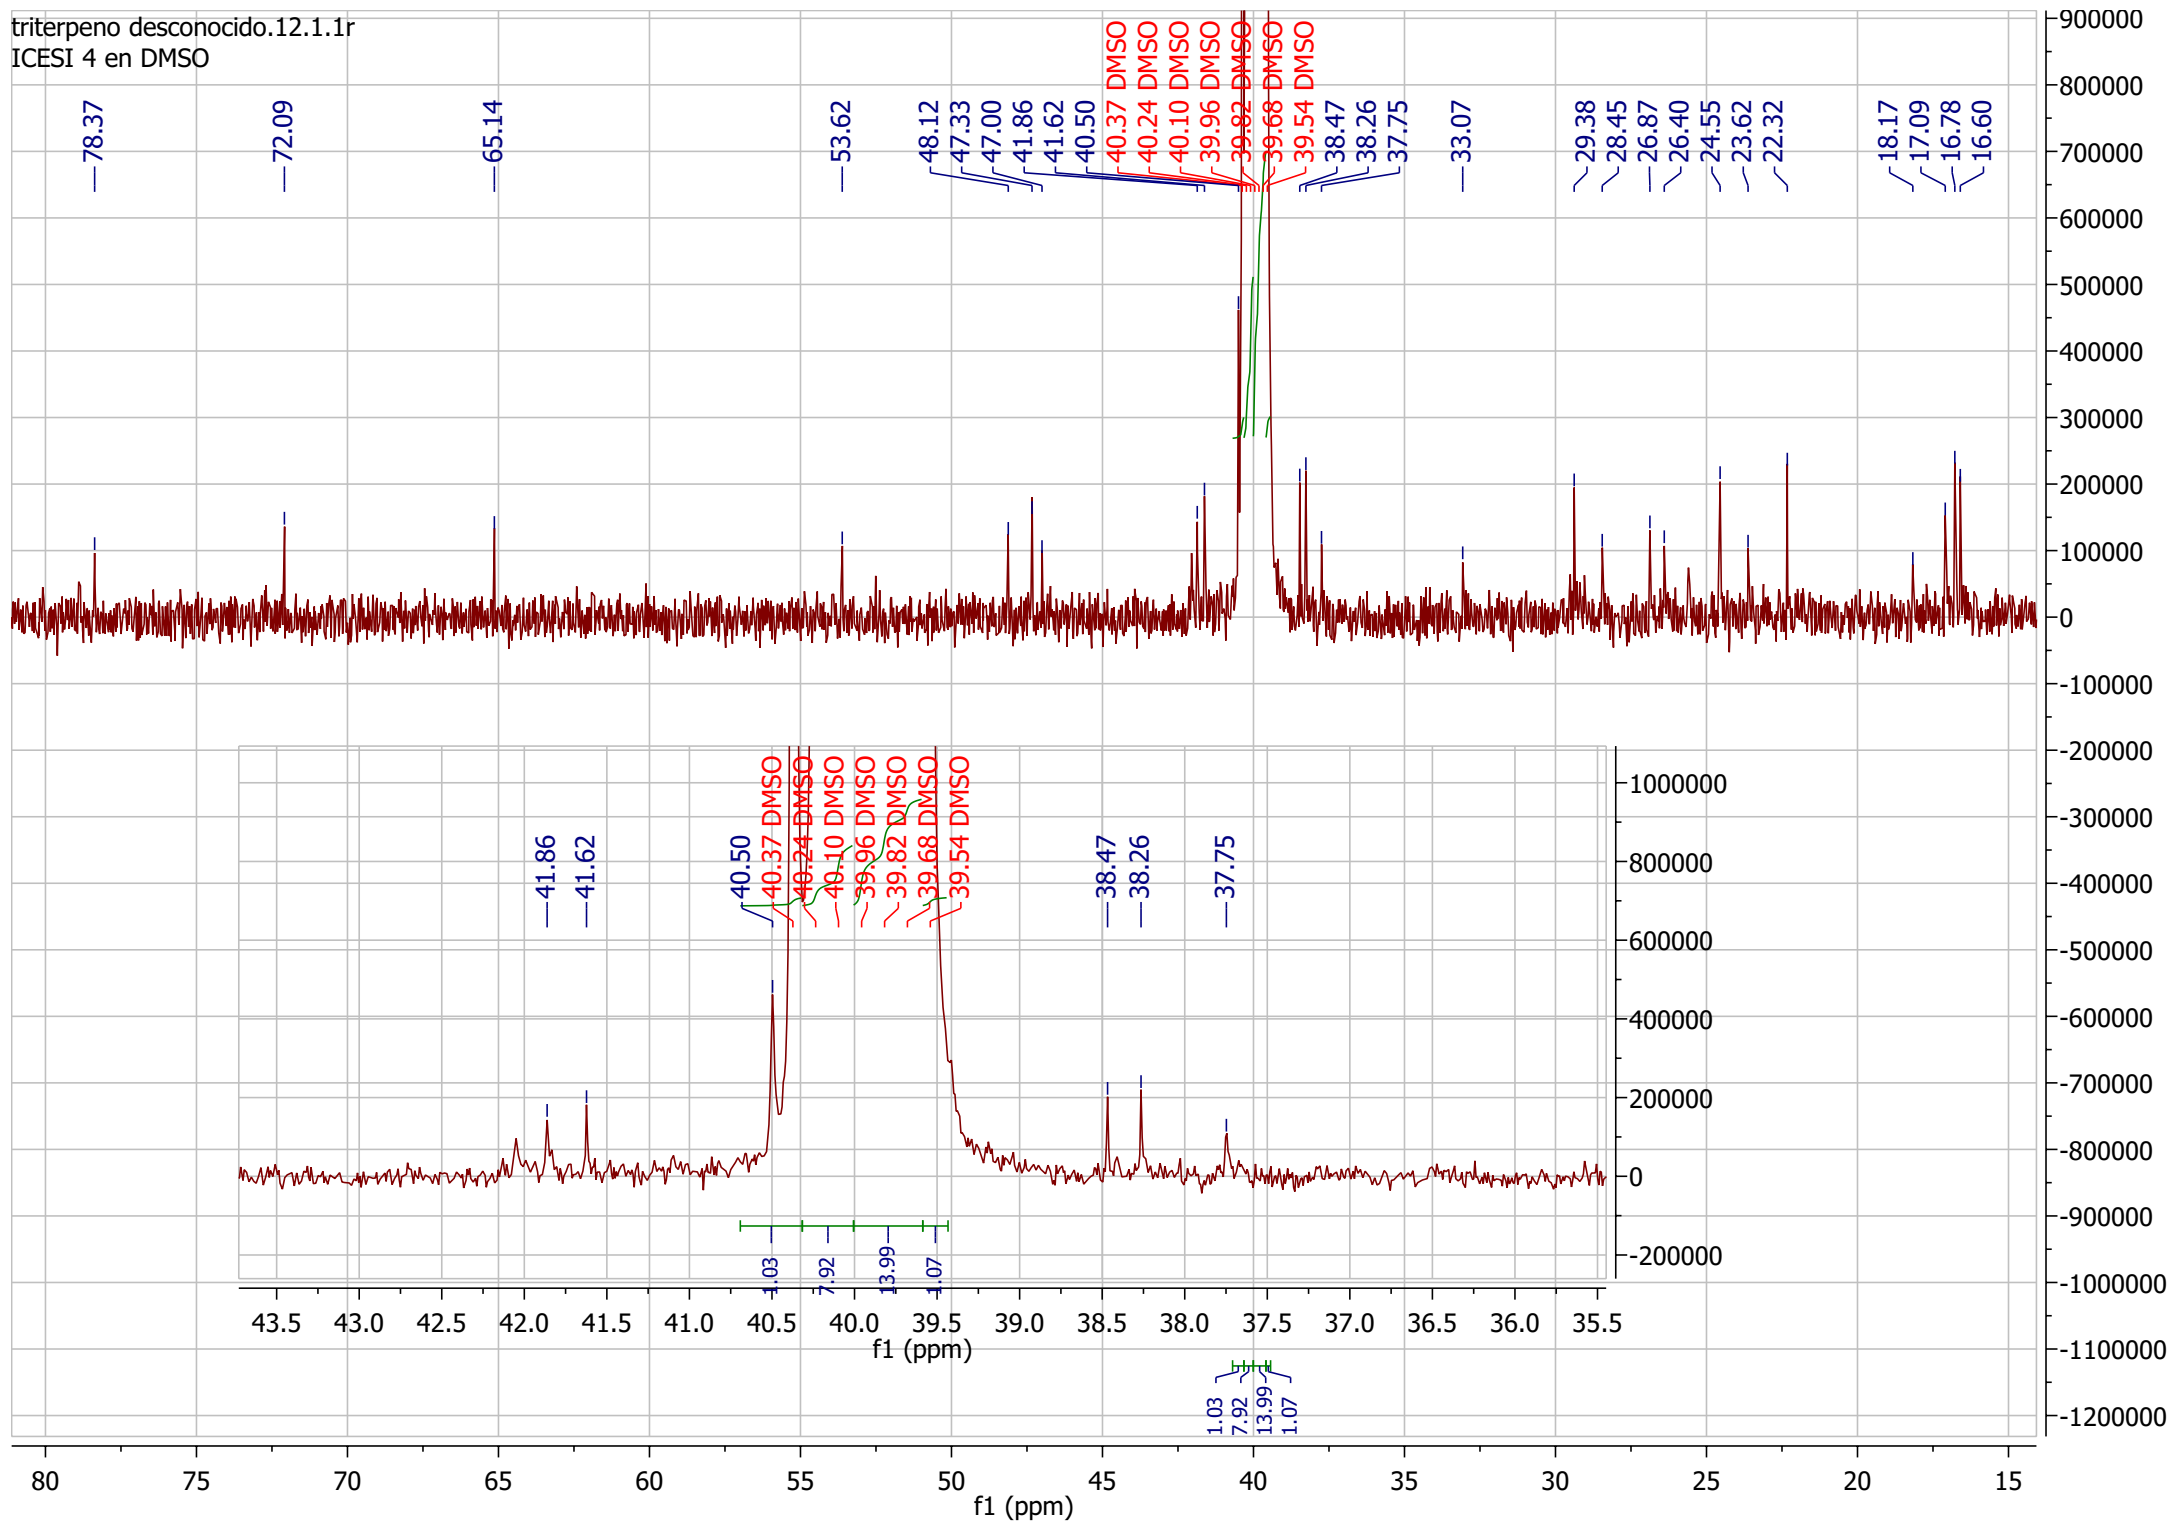

S2.  $^{13}\text{C}$ -NMR complete spectrum with  
a zoom between 14 and 49 ppm

$^{13}\text{C}$  NMR (151 MHz,  $\text{DMSO-}d_6$ )  $\delta$  179.43, 127.26, 78.38, 72.10, 53.63, 48.12, 47.34, 47.00, 41.86, 41.63, 40.39, 40.25, 40.11, 39.97, 39.83, 39.69, 39.56, 38.47, 38.27, 37.74, 33.09, 29.37, 26.88, 26.39, 24.55, 23.63, 22.32, 17.10, 16.76, 16.59.

triterpeno desconocido.101.1.1r  
Carbono 13

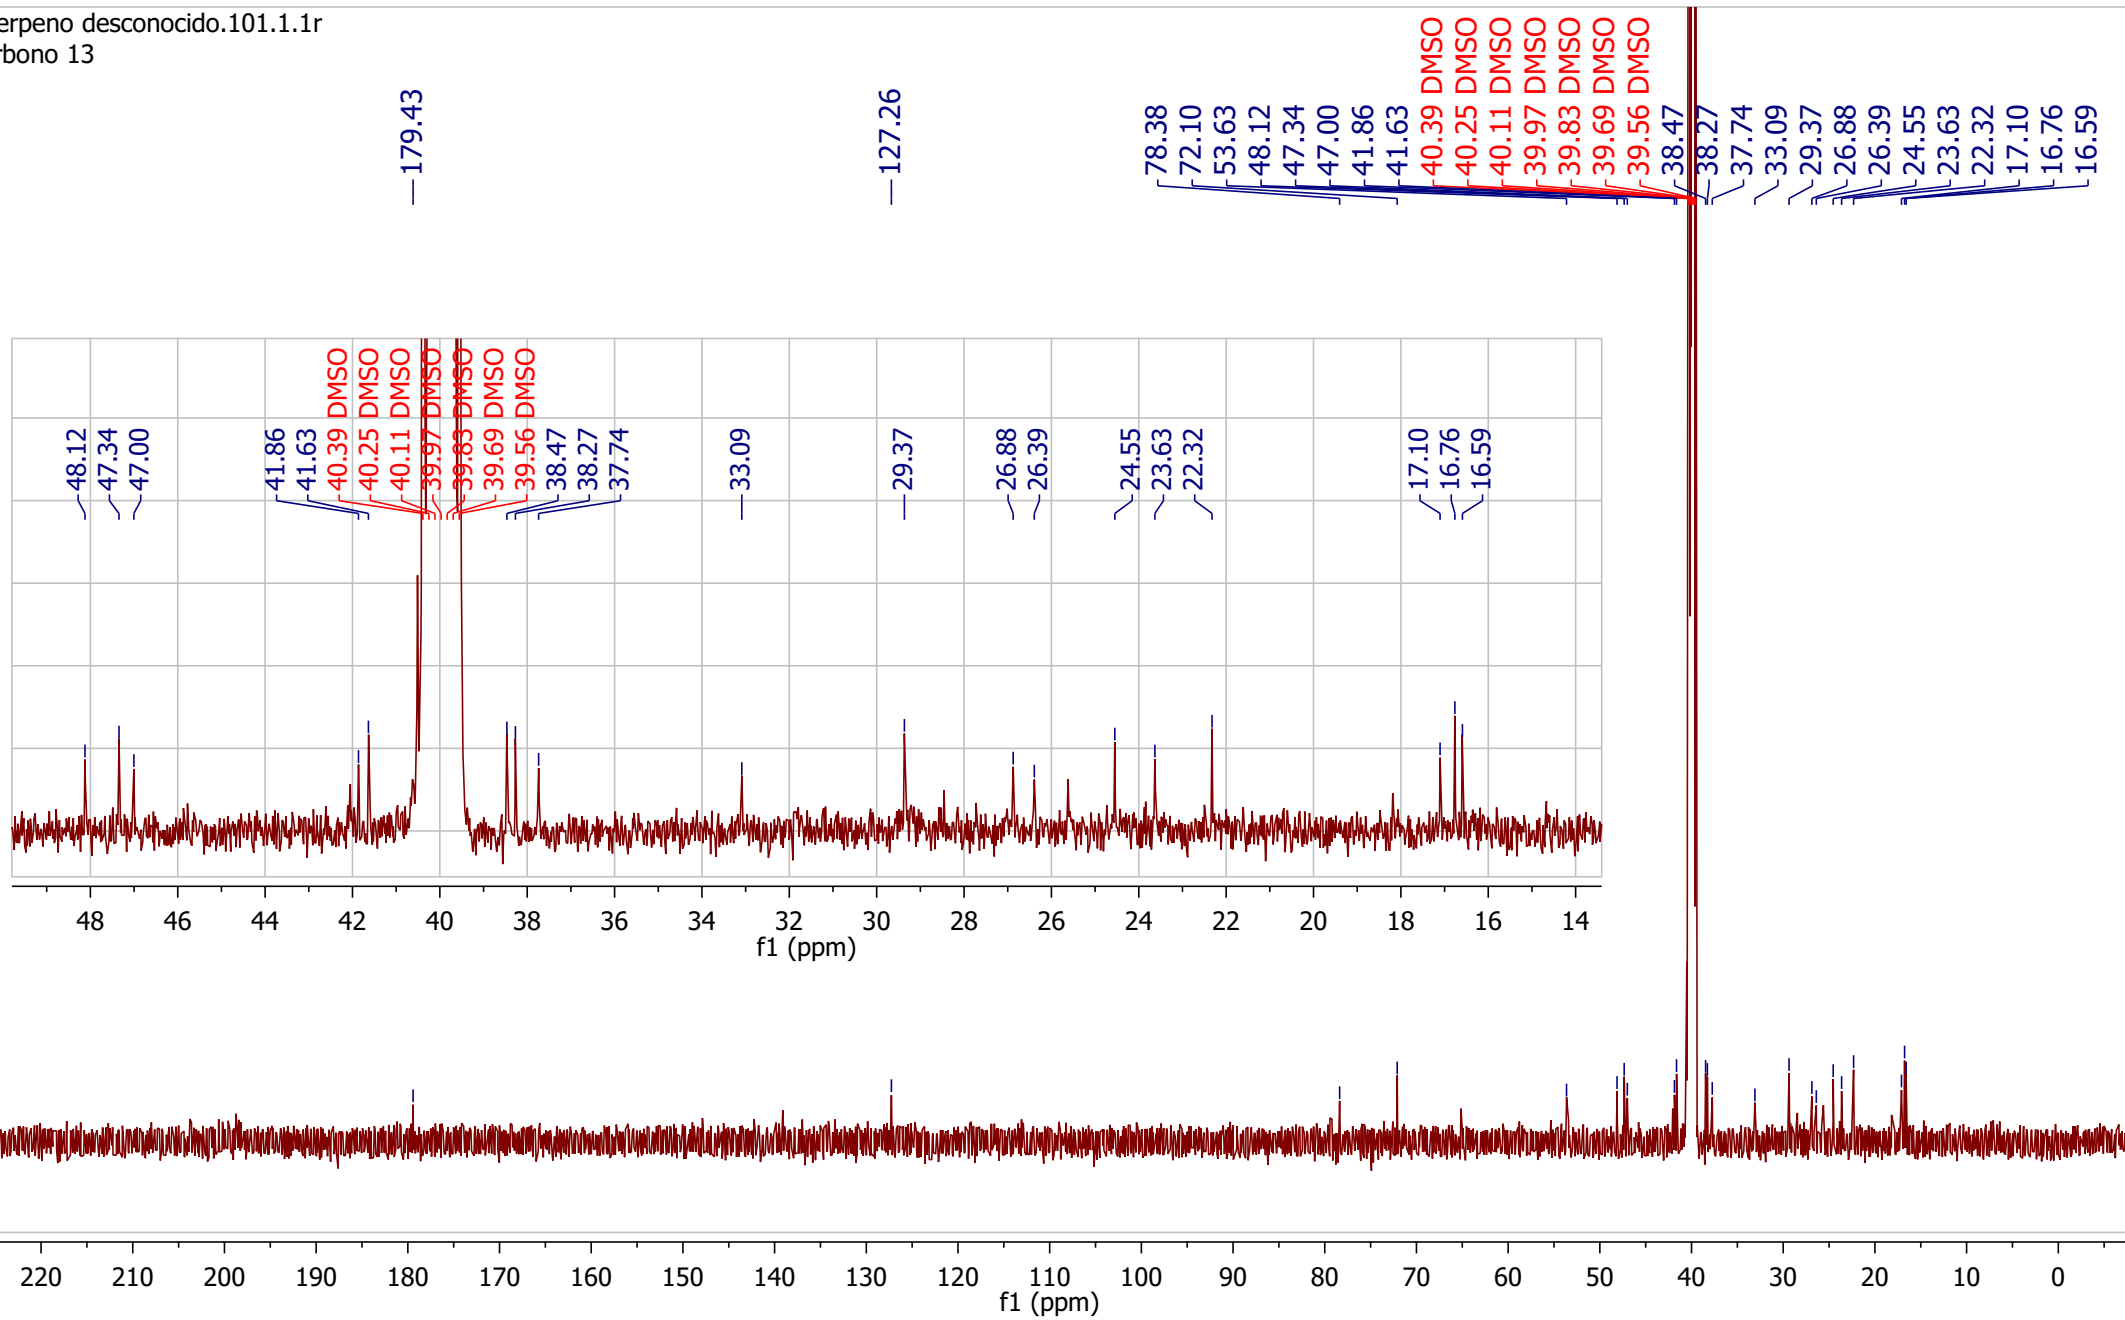

S3. DEPT 135 spectrum

triterpeno desconocido.13.1.1r  
ICESI 4 en DMSO

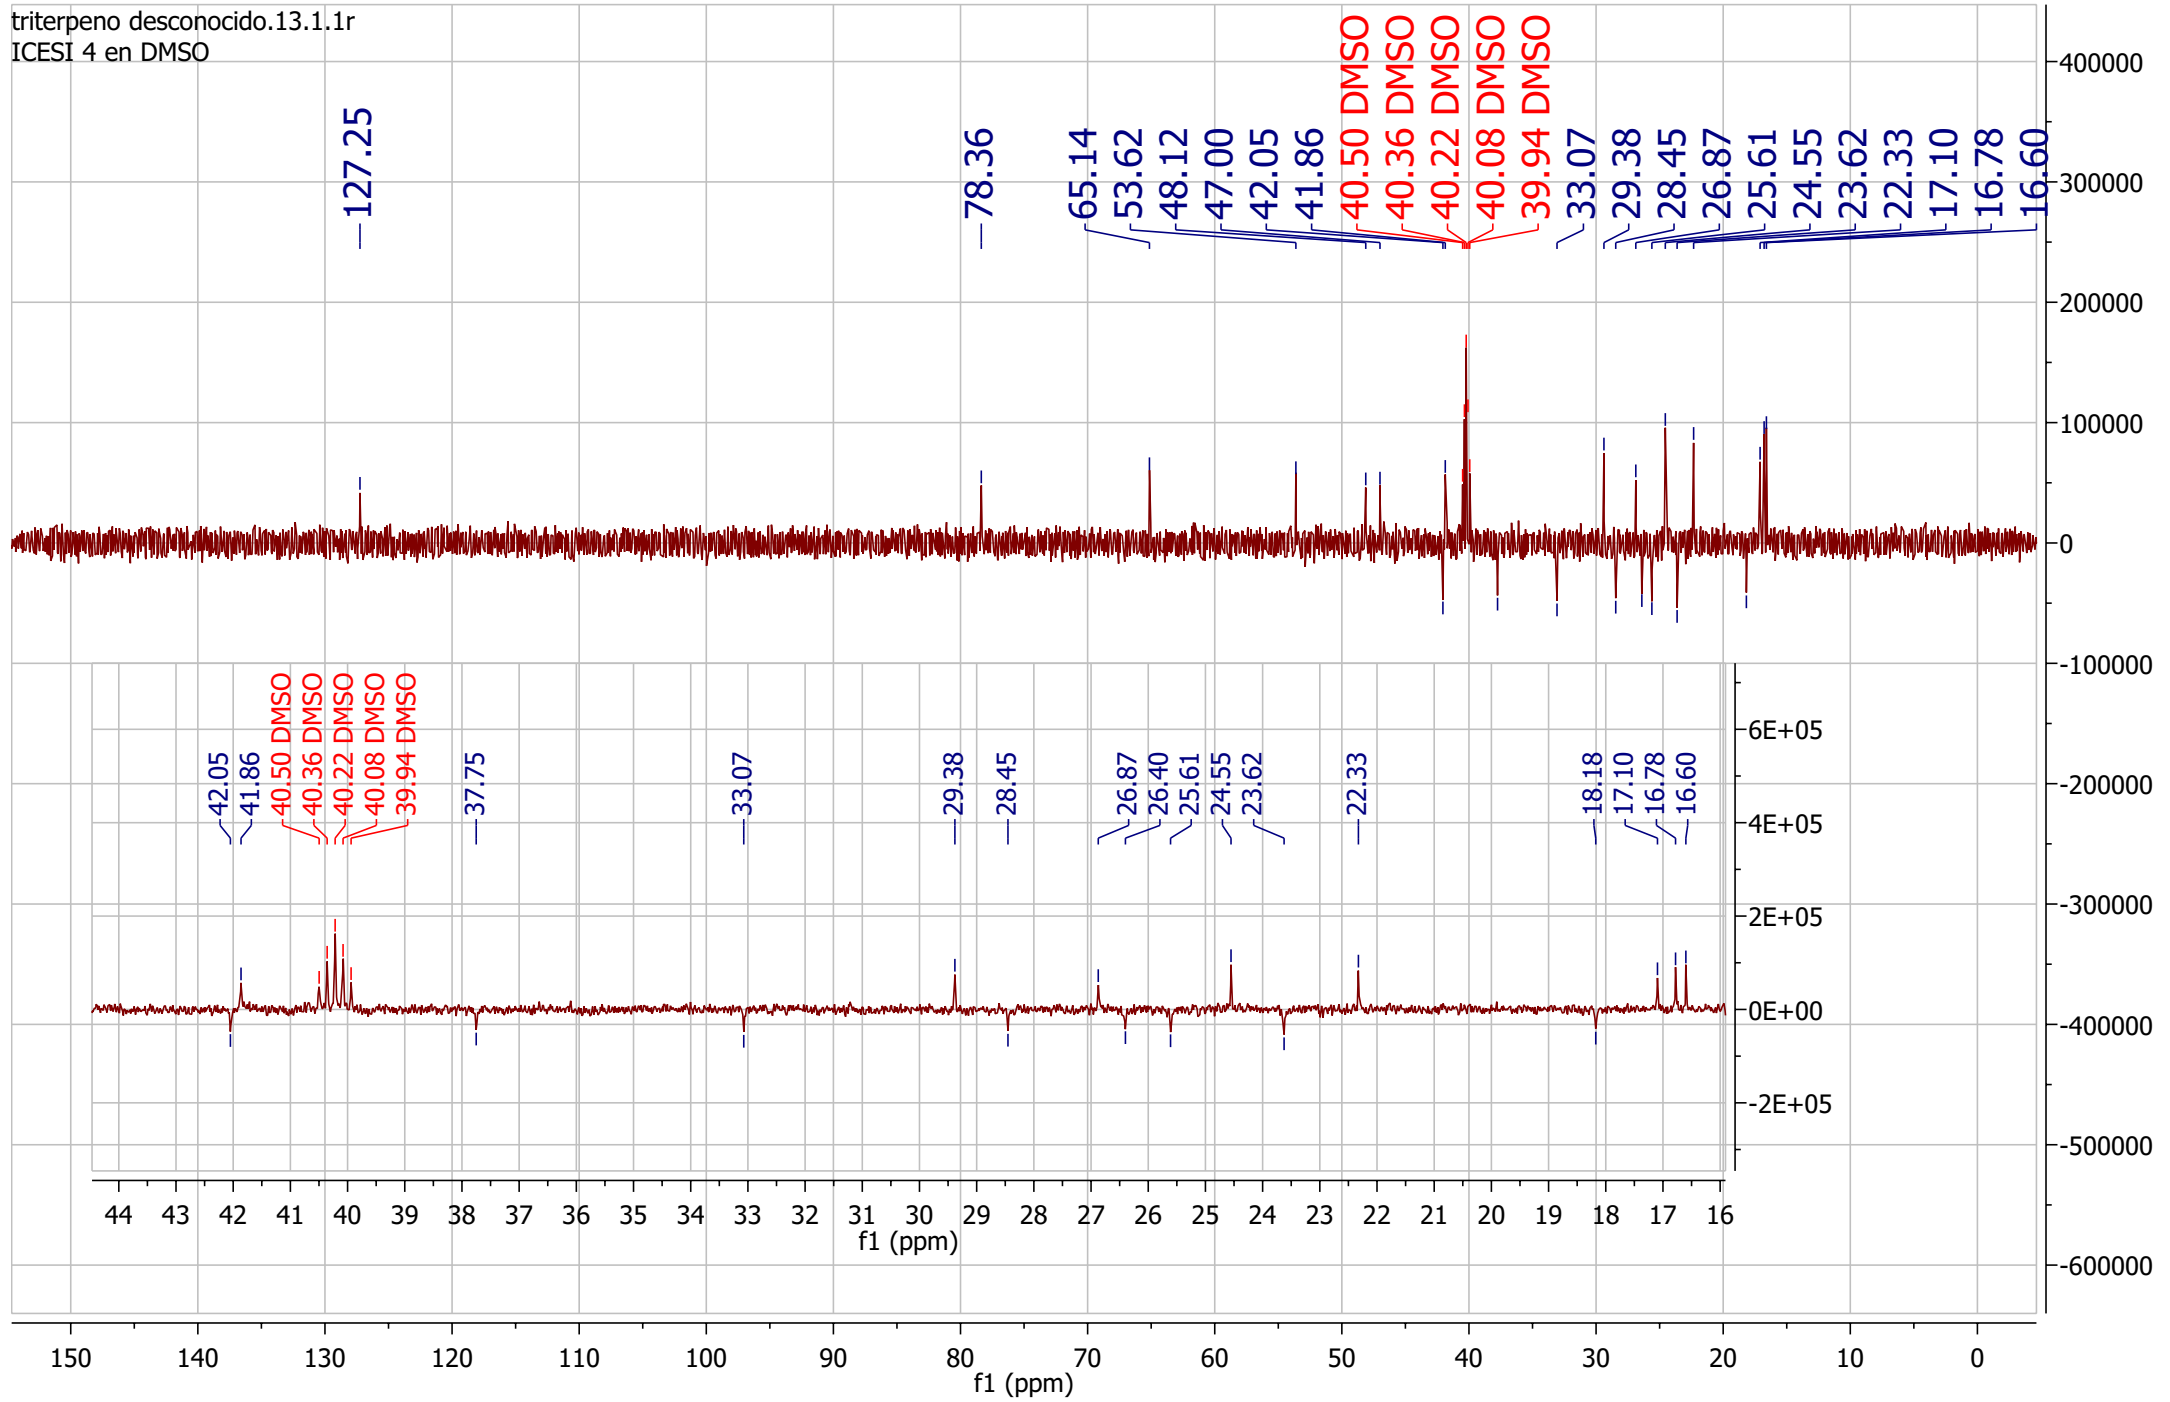

## S4. COSY H-H Spectrum

triterpeno desconocido.11.1.2rr  
ICESI 4 en DMSO

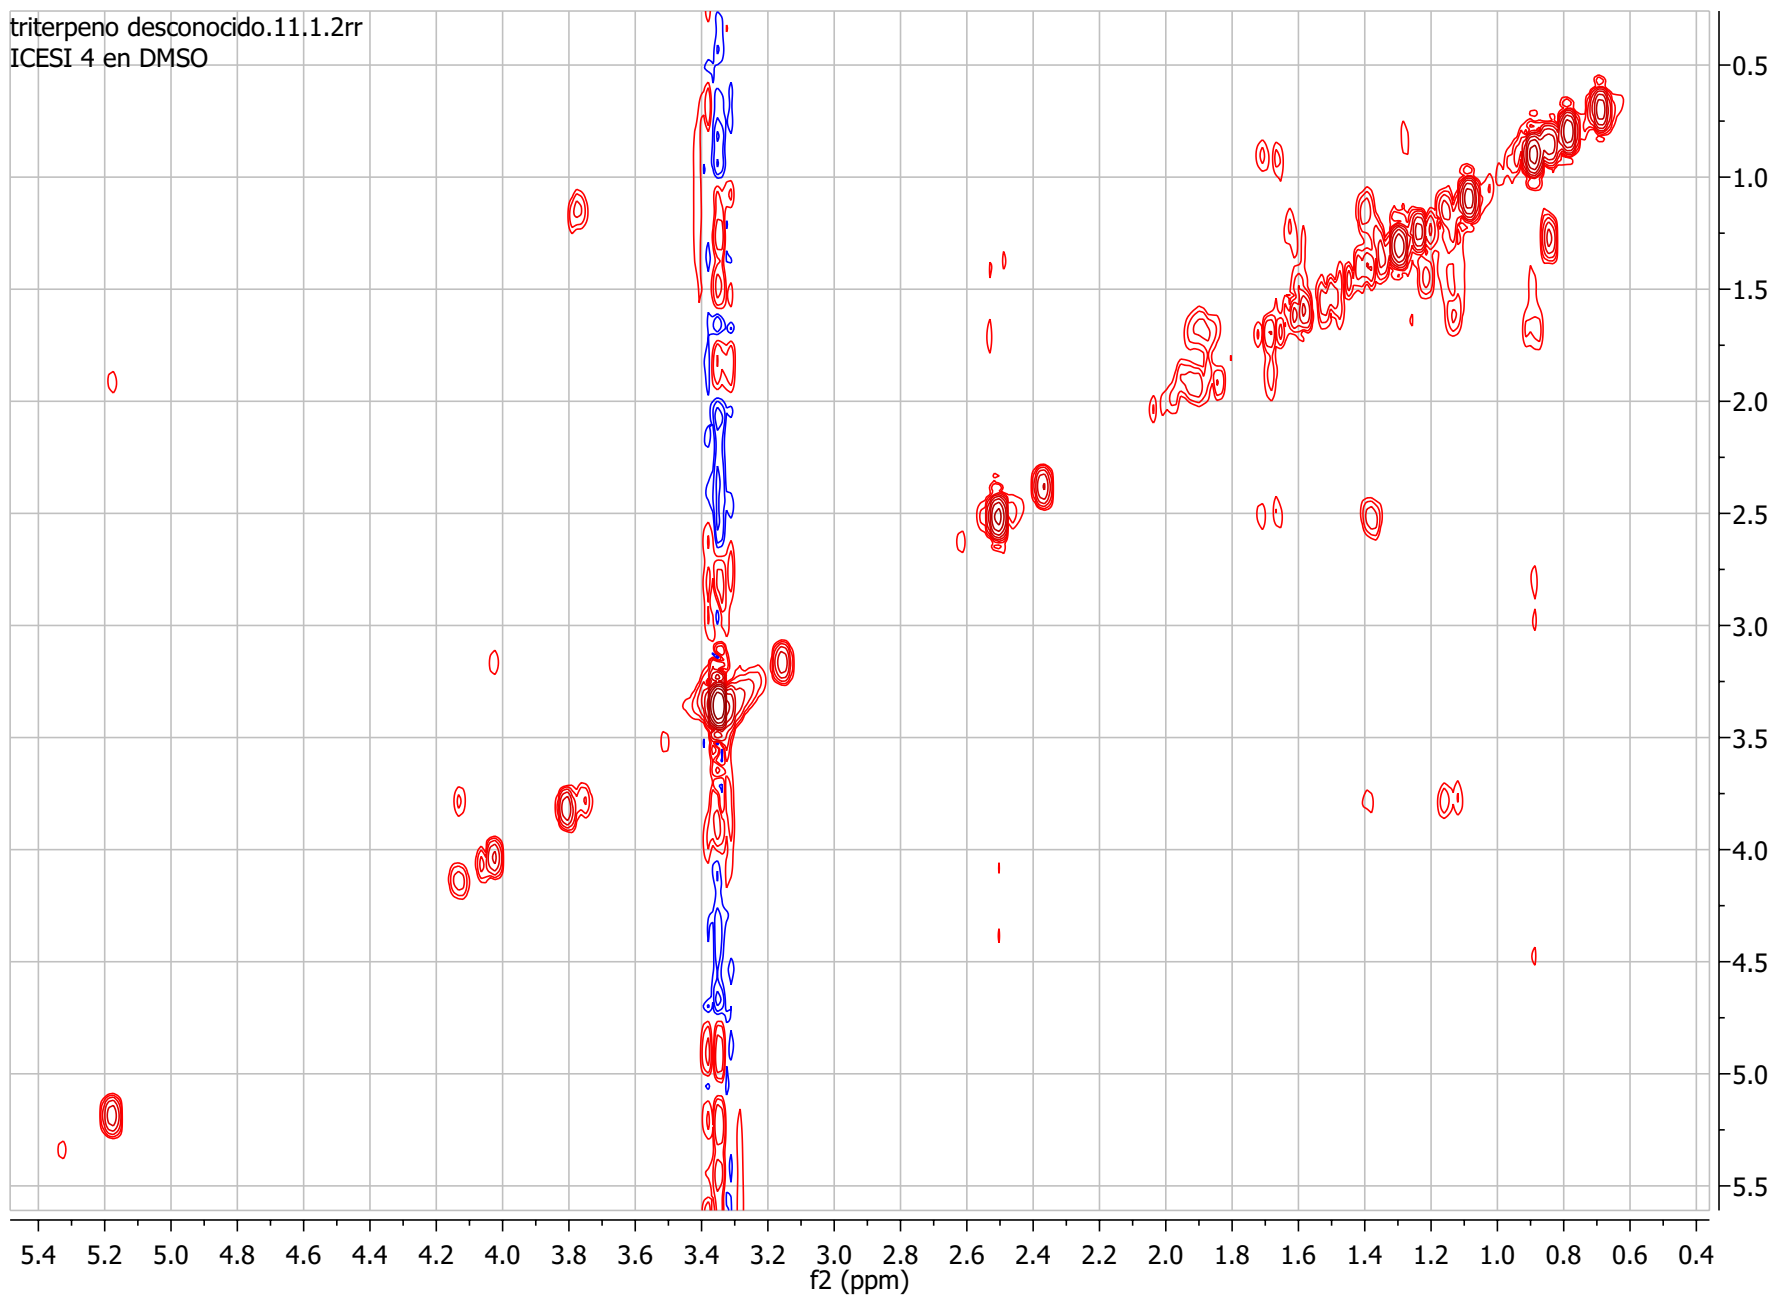



S5. HMBC spectrum and a zoom in the chemical shifts of methyl groups

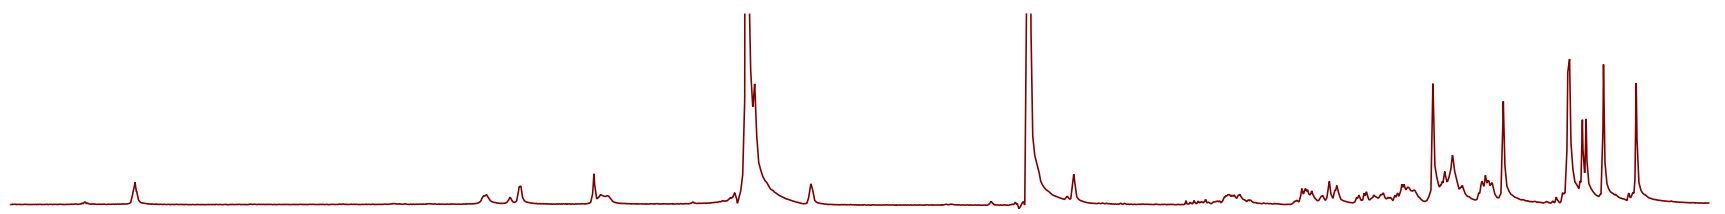

triterpeno desconocido.14.1.2rr  
ICESI 4 en DMSO

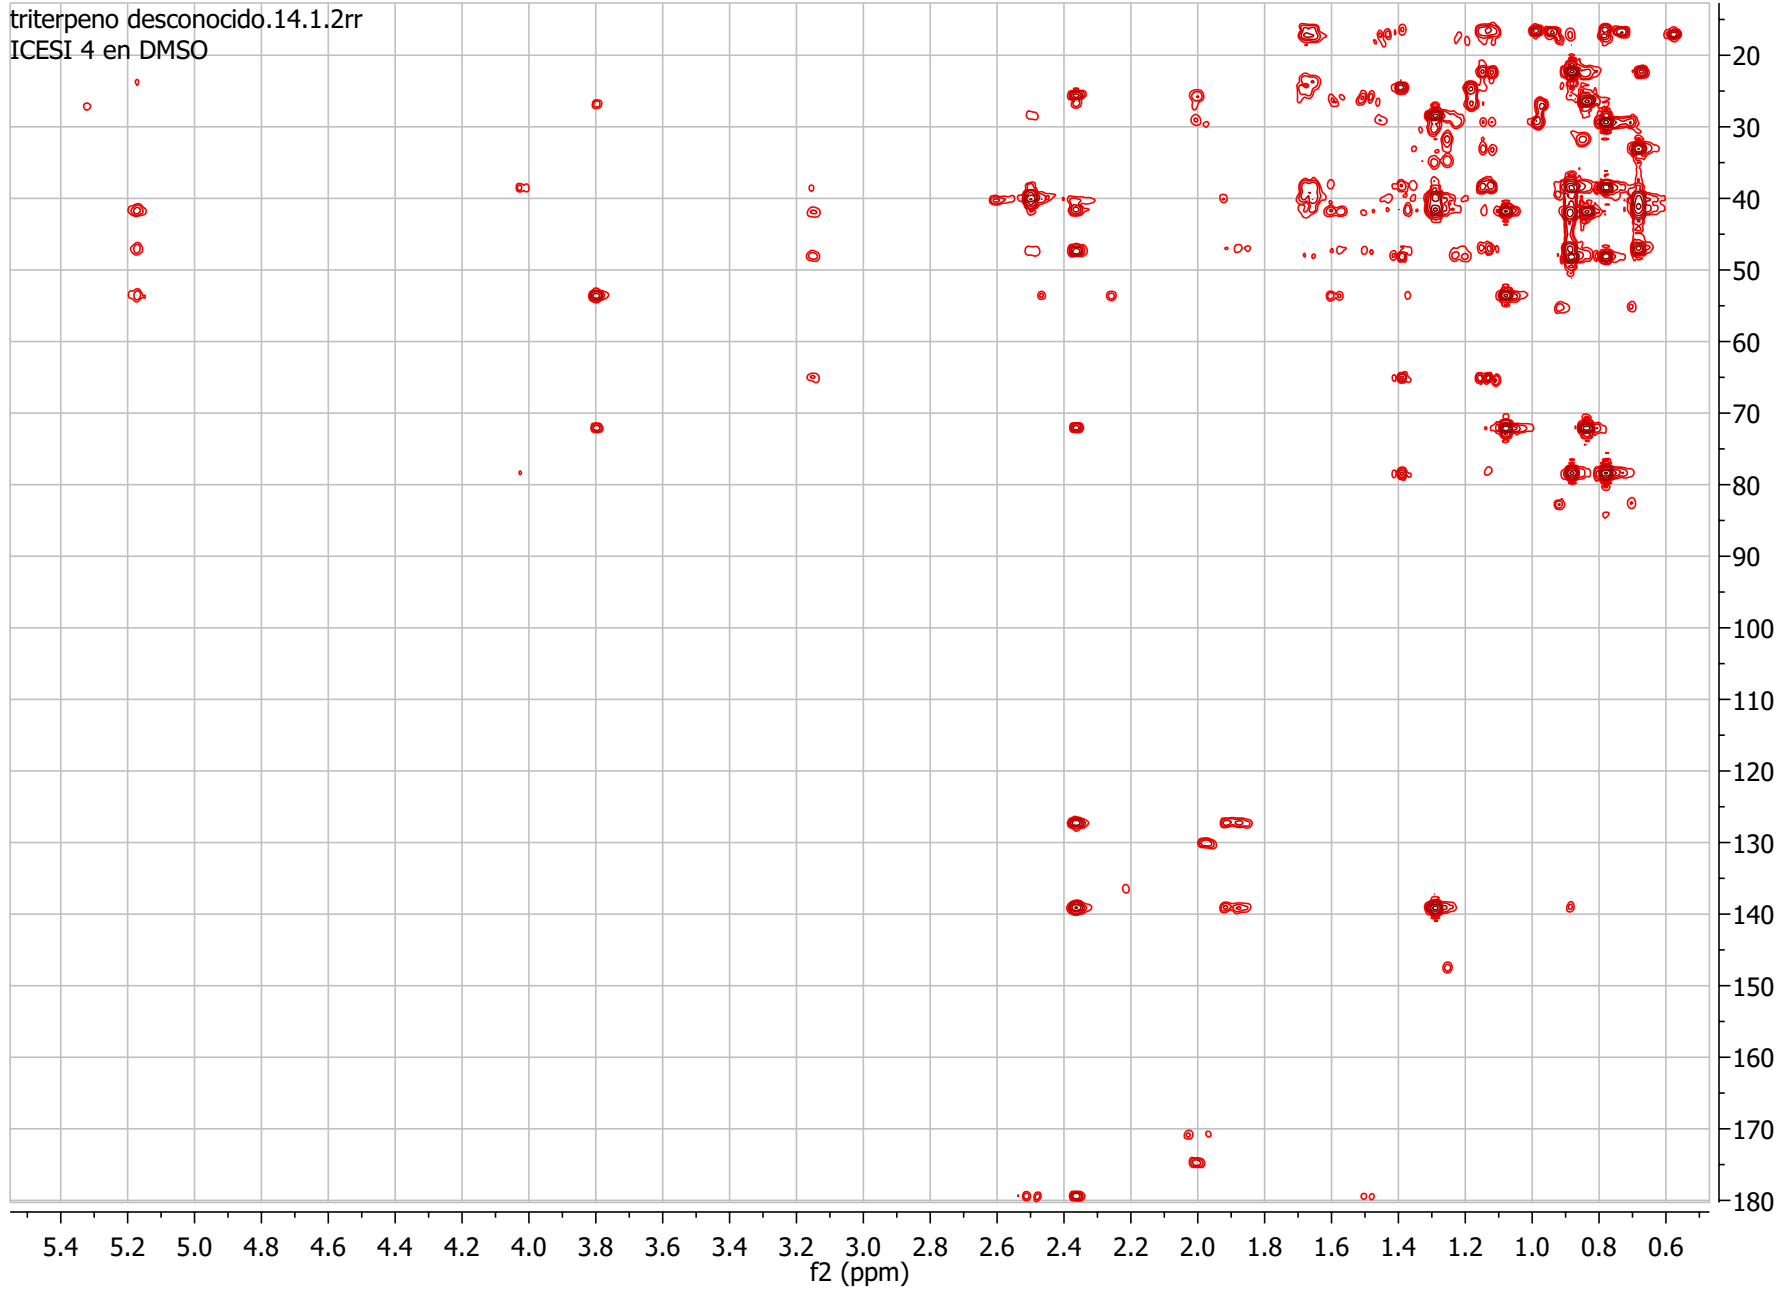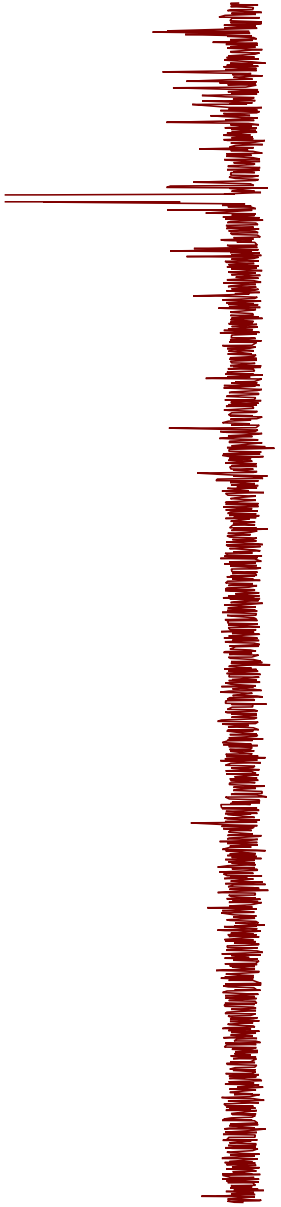

f1 (ppm)

f2 (ppm)

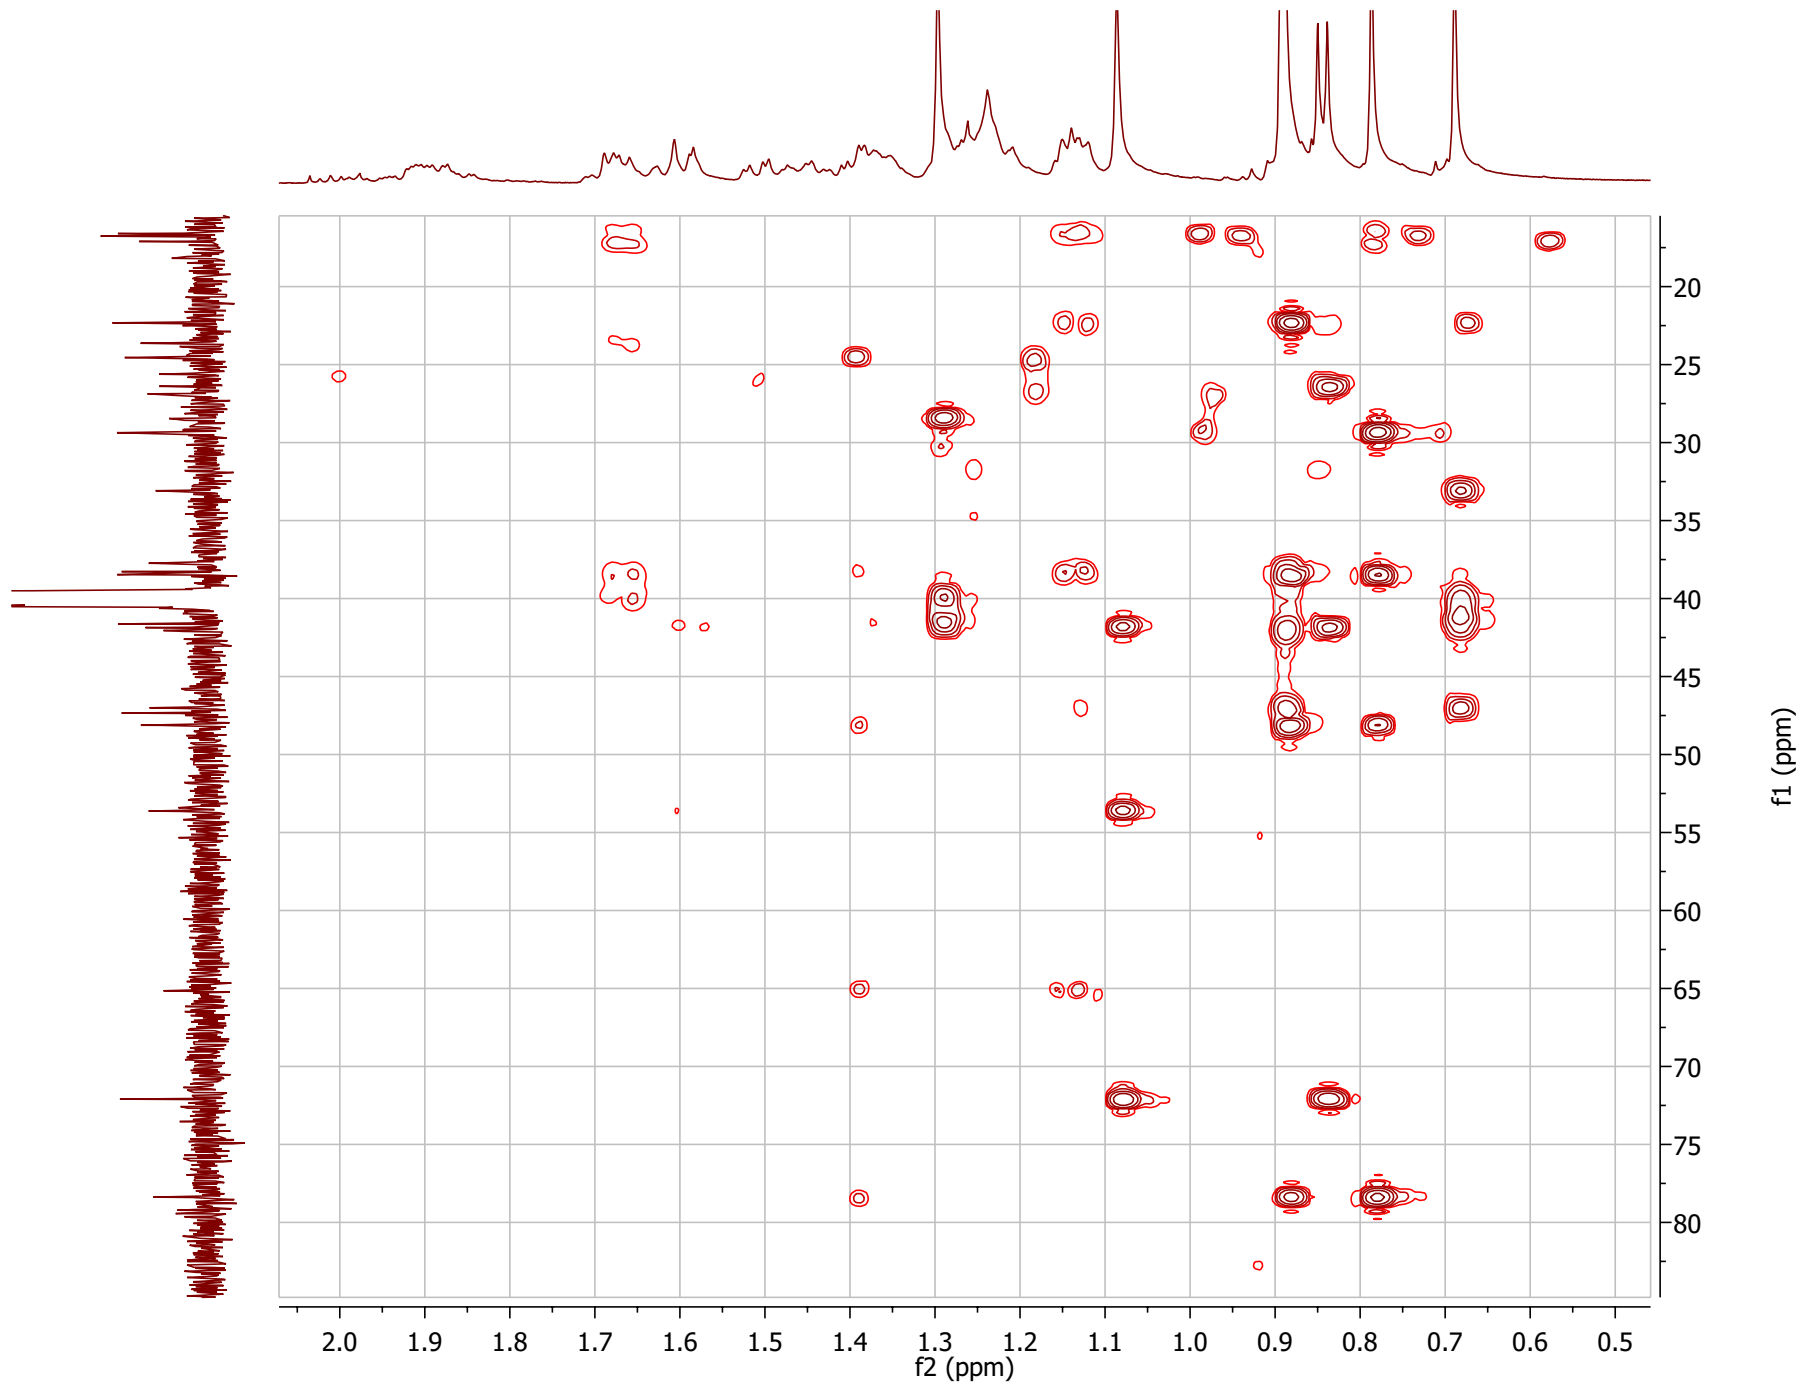

S6. A selective HSQC spectrum and a zoom in the chemical shifts of methyl groups

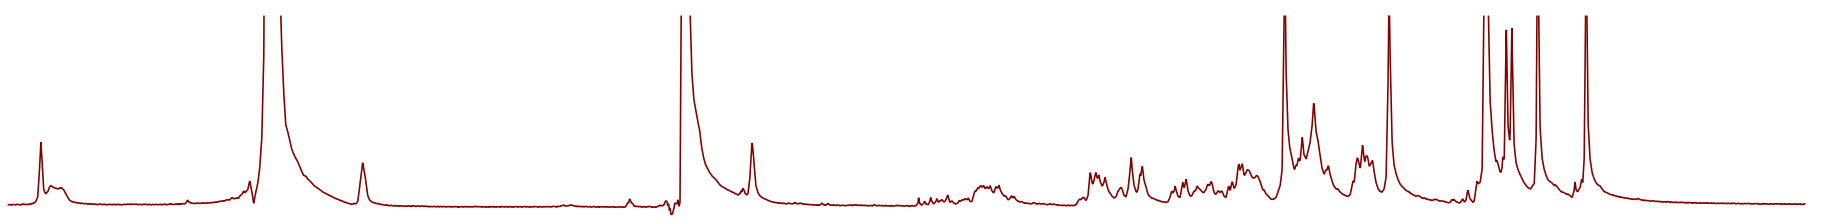

triterpeno desconocido.20.1.2rr  
ICESI 4 en CDCl3 y MeOD  
Otra muestra in DMSO  
HSQC  
2D selective HSQC

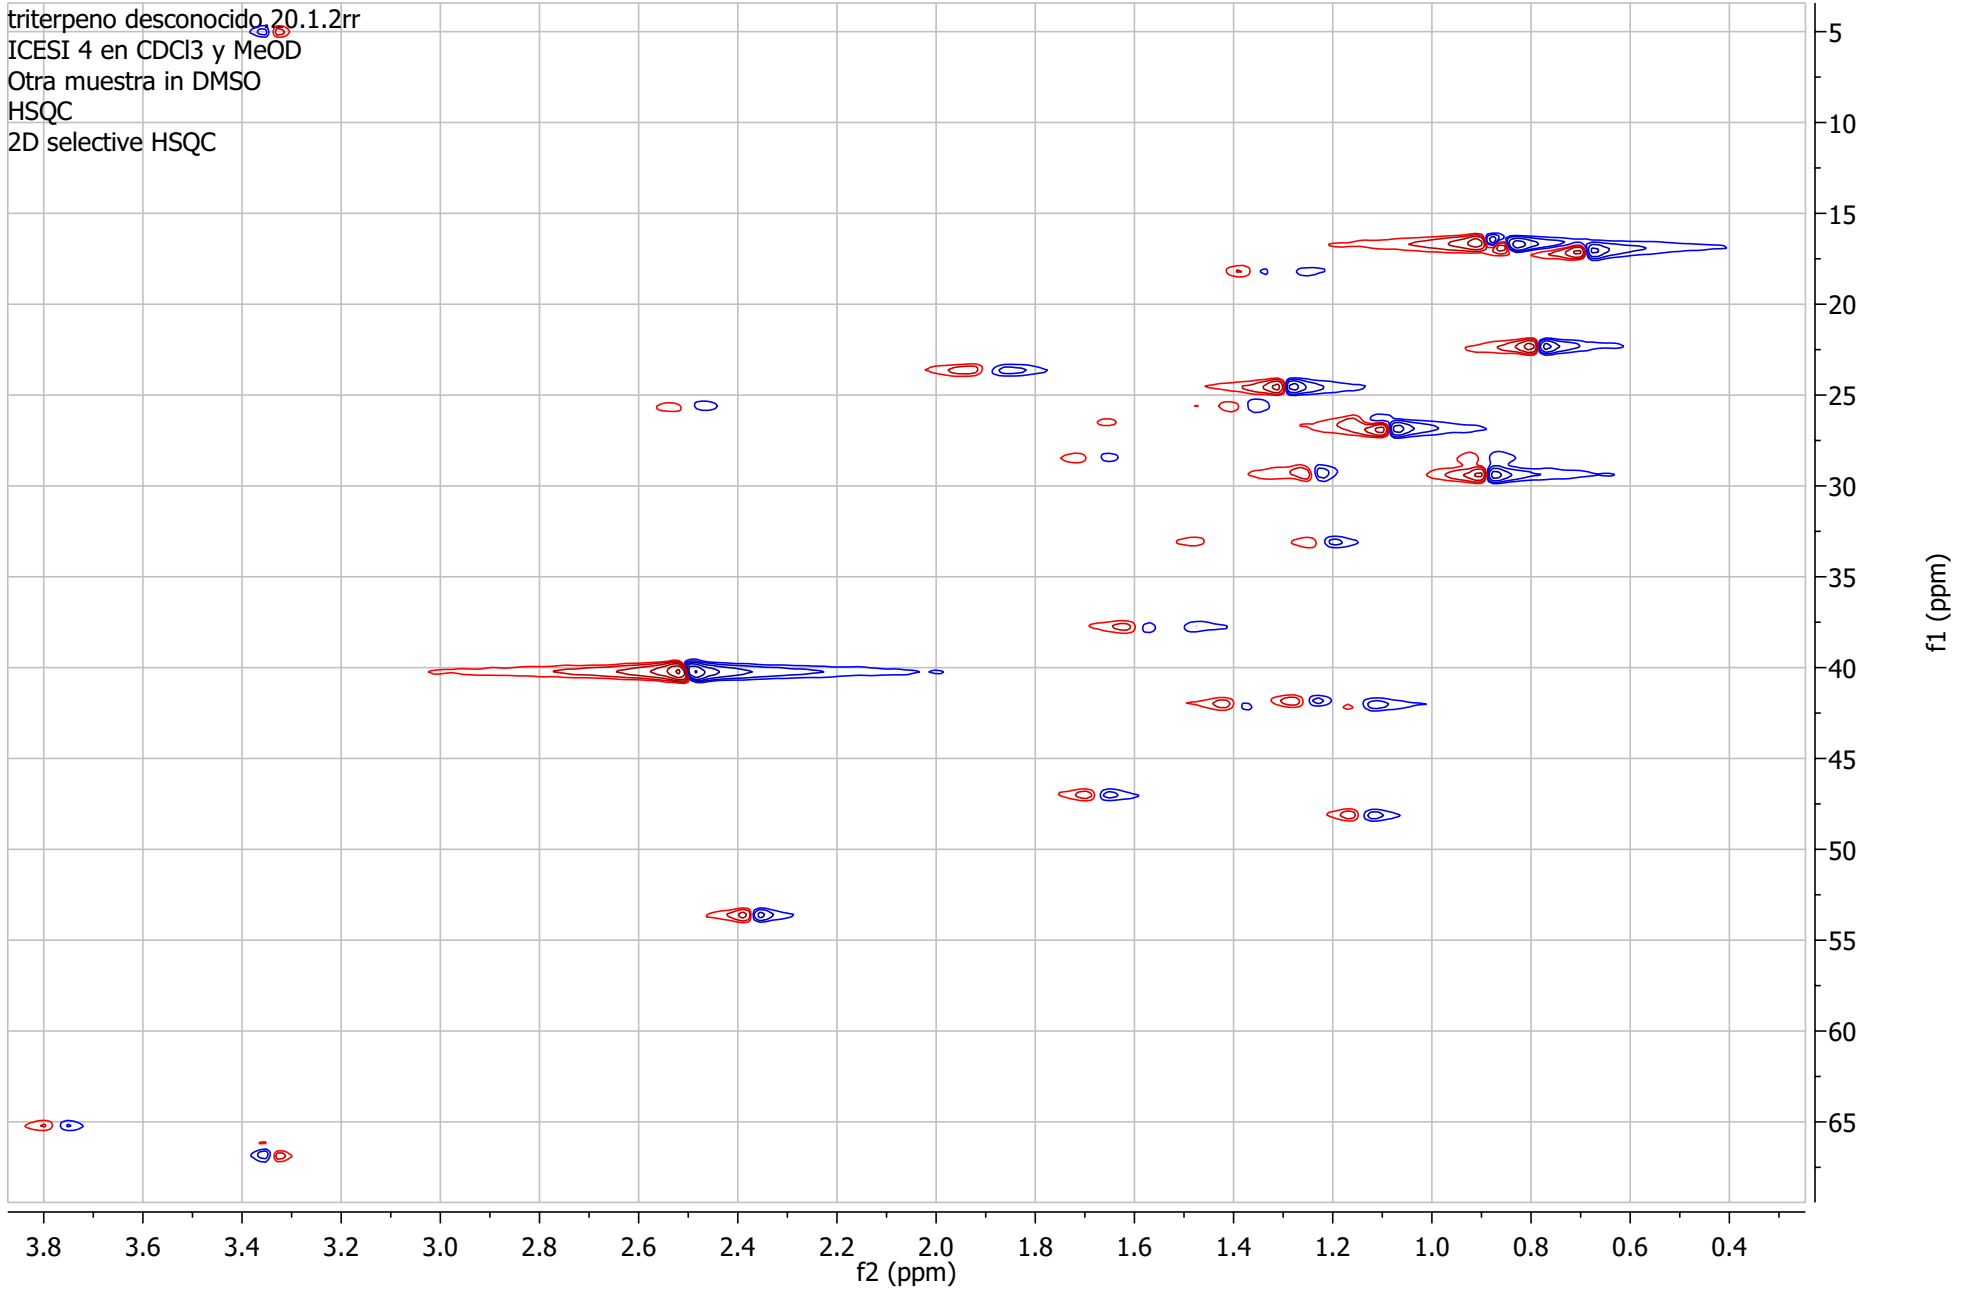

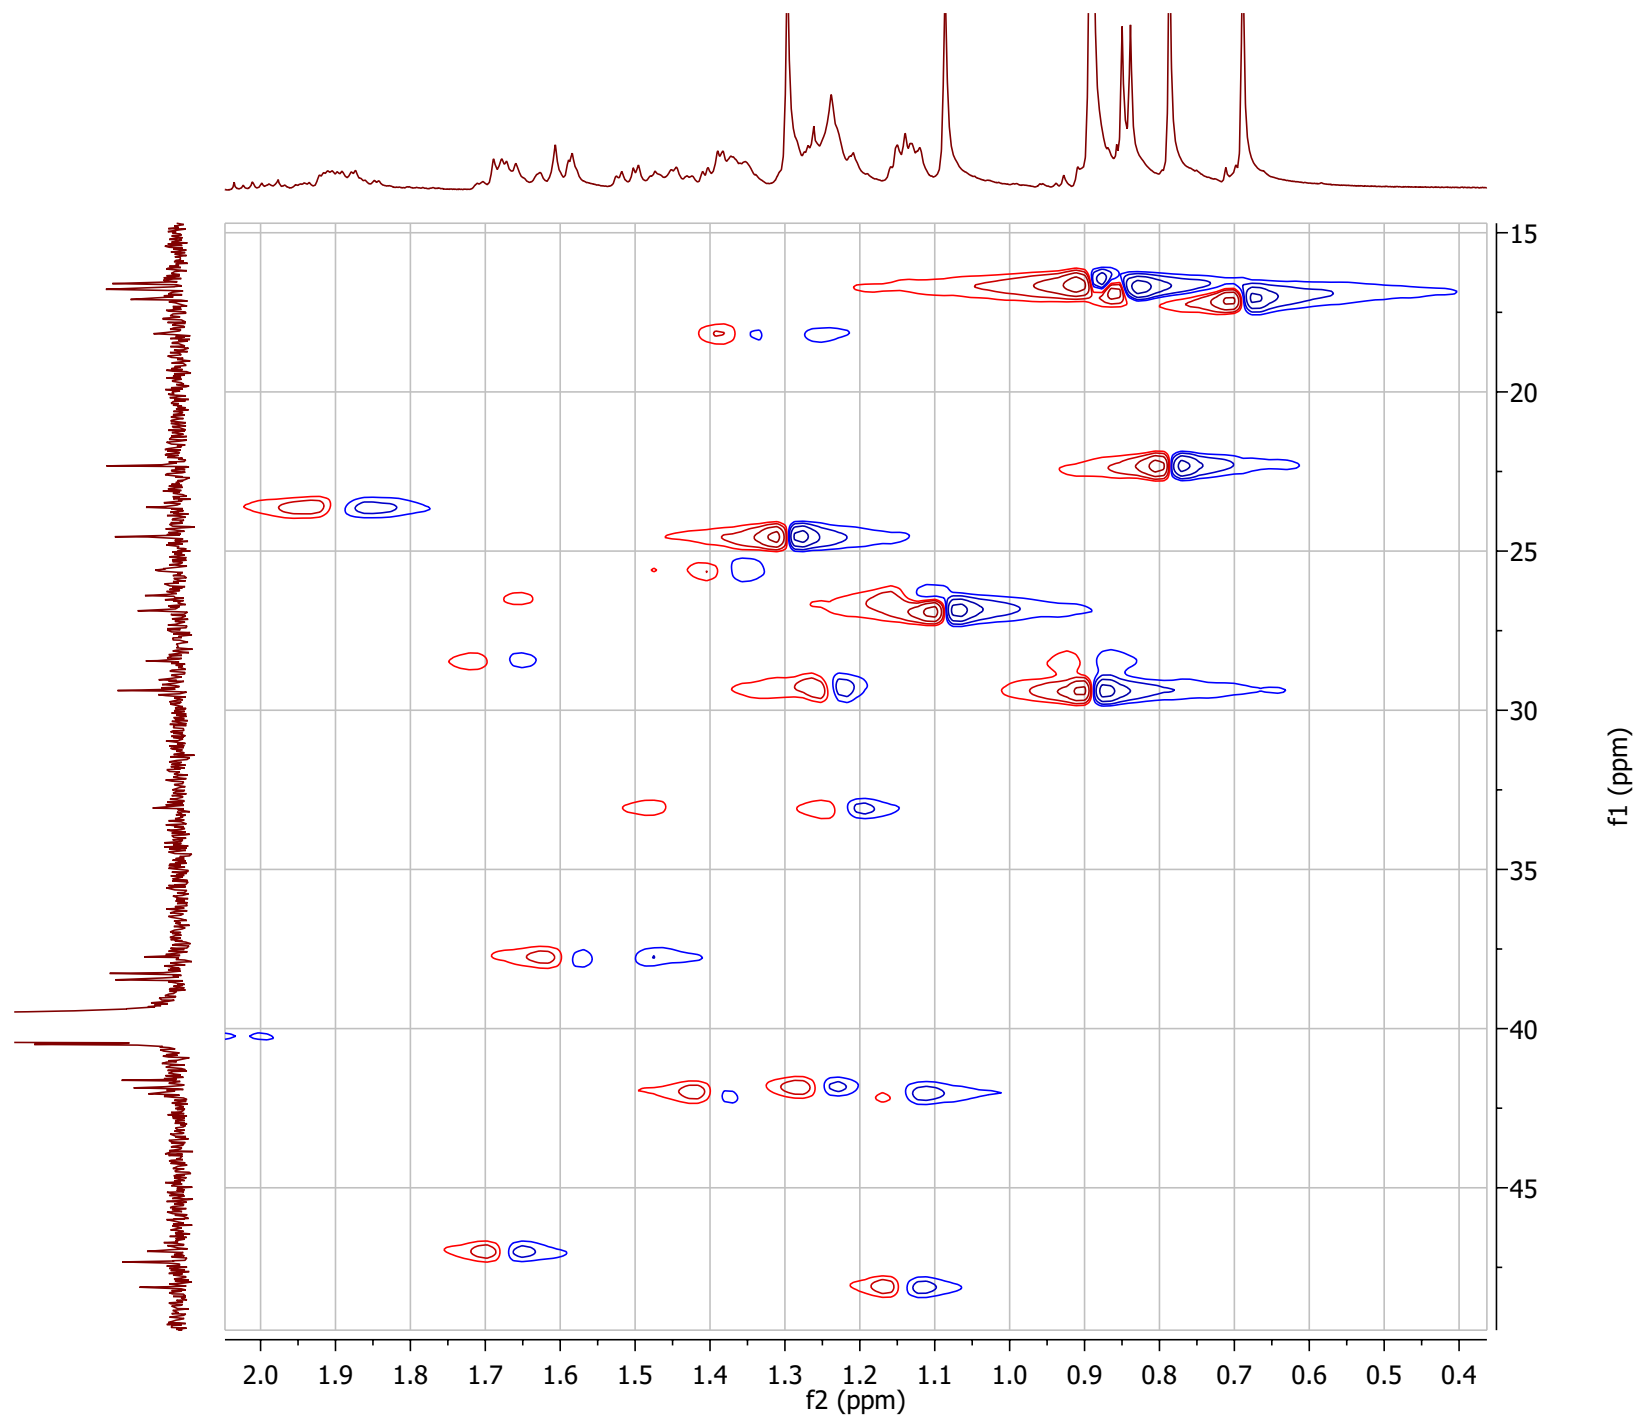

S7.  $^1\text{H}$ - $^{13}\text{C}$  multiplicity-edited HSQC  
using echo-antiecho spectrum with a  
zoom in the chemical shifts of methyl  
groups

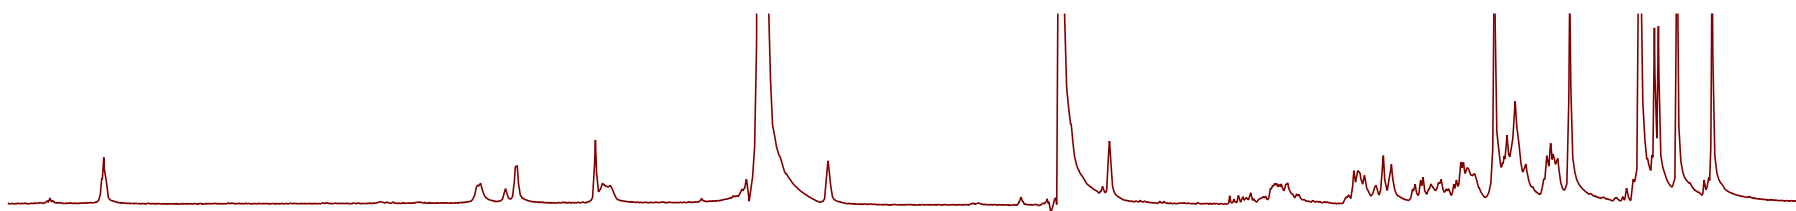

triterpeno desconocido.100.1.2rr  
HSQCEDETGP

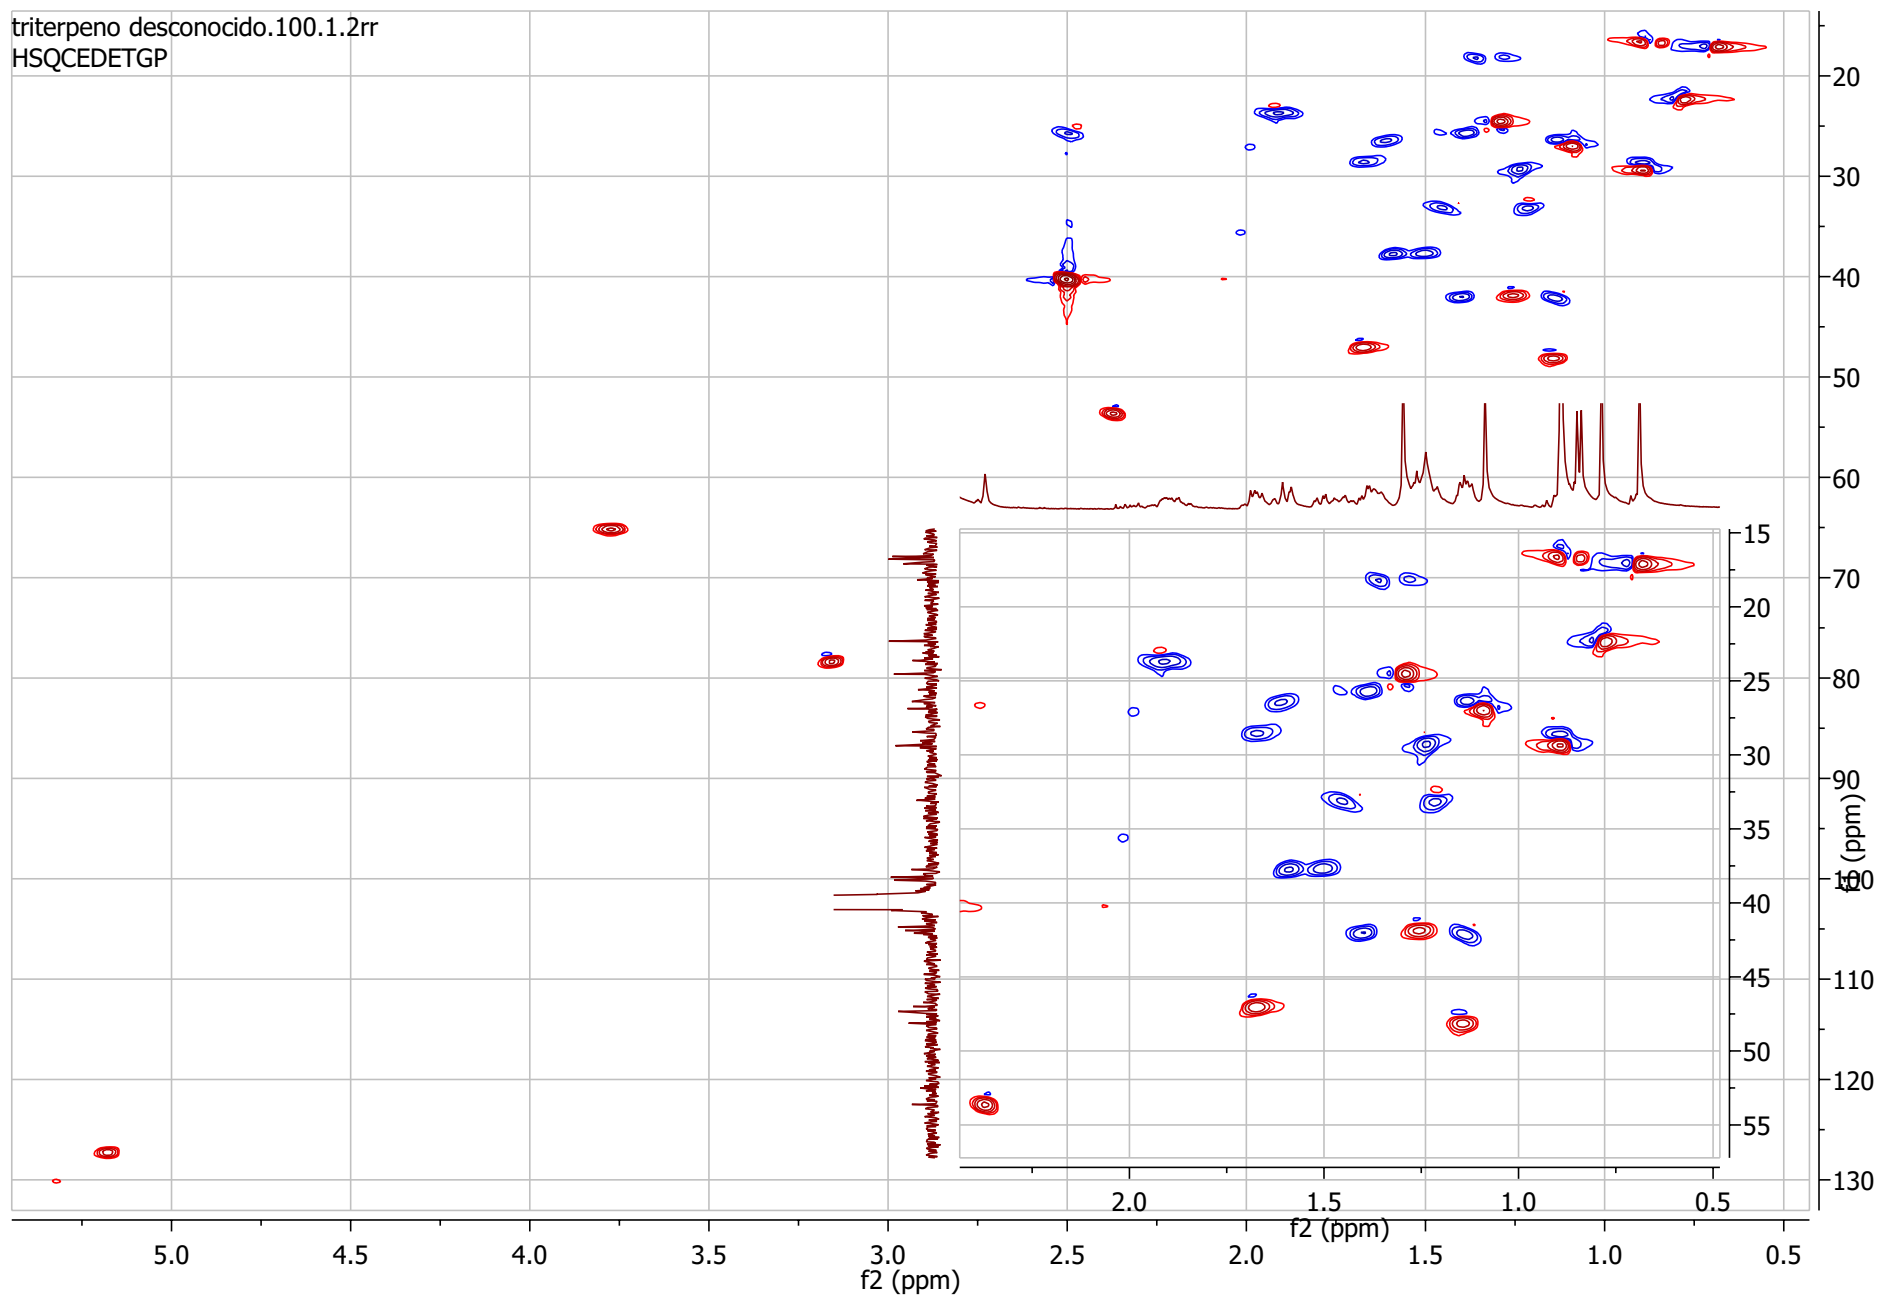

Supplement: molecules-23-01444-s001.pdf [file molecules-23-01444-s001.pdf]
